# Supplementary material for: When good for business is not good enough: Effects of pro-diversity beliefs and instrumentality of diversity on intergroup attitudes
Source: PubMed Central journal article supplement (PMC7263624; doi:10.1371/journal.pone.0234179), 2020-06-01
Supplement: pone.0234179.s004.pdf [file pone.0234179.s004.pdf]

**S1 Table. Results of Study 1 with inclusion of covariate political orientation**

|                                                 | general attitudes                                                        |           |          |                          | warmth                                                                   |           |          |                          | competence                                                               |           |          |                          |
|-------------------------------------------------|--------------------------------------------------------------------------|-----------|----------|--------------------------|--------------------------------------------------------------------------|-----------|----------|--------------------------|--------------------------------------------------------------------------|-----------|----------|--------------------------|
|                                                 | <i>b</i>                                                                 | <i>SE</i> | <i>p</i> | <i>CI</i> <sub>95%</sub> | <i>b</i>                                                                 | <i>SE</i> | <i>p</i> | <i>CI</i> <sub>95%</sub> | <i>b</i>                                                                 | <i>SE</i> | <i>p</i> | <i>CI</i> <sub>95%</sub> |
| constant                                        | -0.672                                                                   | 1.410     | .635     | -3.471, 2.126            | 1.559                                                                    | 0.574     | .008     | 0.420, 2.700             | 0.999                                                                    | 0.620     | .110     | -0.231, 2.230            |
| political orientation                           | -0.136                                                                   | 0.130     | .296     | -0.393, 0.121            | -0.074                                                                   | 0.054     | .170     | -0.181, 0.032            | 0.003                                                                    | 0.058     | .965     | -0.113, 0.118            |
| pro-diversity beliefs                           | 2.014                                                                    | 0.314     | .001     | 1.391, 2.638             | 0.558                                                                    | 0.129     | .001     | 0.303, 0.814             | 0.627                                                                    | 0.139     | .001     | 0.351, 0.903             |
| neutral div. vs. instr. div. (D1)               | 2.172                                                                    | 1.930     | .263     | -1.658, 6.002            | 0.388                                                                    | 0.798     | .628     | -1.196, 1.971            | 0.858                                                                    | 0.862     | .322     | -0.853, 2.568            |
| detrimental div. vs. instr. div. (D2)           | 3.432                                                                    | 1.558     | .030     | 0.341, 6.523             | 1.172                                                                    | 0.635     | .068     | -0.089, 2.432            | 1.248                                                                    | 0.686     | .072     | -0.113, 2.610            |
| detrimental non-div. vs. instr. div. (D3)       | 2.263                                                                    | 2.371     | .342     | -2.443, 6.968            | 0.804                                                                    | 0.984     | .416     | -1.148, 2.766            | -0.767                                                                   | 1.063     | .472     | -2.876, 1.342            |
| D1 X pro-diversity beliefs                      | -0.593                                                                   | 0.487     | .226     | -1.559, 0.372            | -0.144                                                                   | 0.202     | .478     | -0.544, 0.257            | -0.230                                                                   | 0.218     | .173     | -0.732, 0.133            |
| D2 X pro-diversity beliefs                      | -0.959                                                                   | 0.405     | .020     | -1.761, -0.156           | -0.332                                                                   | 0.166     | .049     | -0.661, -0.002           | -0.349                                                                   | 0.179     | .054     | -.705, 0.007             |
| D3 X pro-diversity beliefs                      | -0.815                                                                   | 0.607     | .183     | -2.020, 0.930            | -0.298                                                                   | 0.252     | .240     | -0.799, 0.202            | 0.099                                                                    | 0.273     | .716     | -0.442, 0.640            |
| <i>R</i> <sup>2</sup>                           | <i>R</i> <sup>2</sup> = .492, <i>F</i> (8, 98) = 11.839, <i>p</i> < .001 |           |          |                          | <i>R</i> <sup>2</sup> = .311, <i>F</i> (8, 100) = 5.647, <i>p</i> < .001 |           |          |                          | <i>R</i> <sup>2</sup> = .304, <i>F</i> (8, 100) = 5.456, <i>p</i> < .001 |           |          |                          |
| <i>R</i> <sup>2</sup> change due to interaction | $\Delta R^2 = .031$ ., <i>F</i> (3, 98) = 1.956, <i>p</i> = .126         |           |          |                          | $\Delta R^2 = .030$ , <i>F</i> (3, 100) = 1.437, <i>p</i> = .237         |           |          |                          | $\Delta R^2 = .040$ , <i>F</i> (3, 100) = 1.894, <i>p</i> = .136         |           |          |                          |
