# Supplementary material for: When good for business is not good enough: Effects of pro-diversity beliefs and instrumentality of diversity on intergroup attitudes
Source: PubMed Central journal article supplement (PMC7263624; doi:10.1371/journal.pone.0234179), 2020-06-01
Supplement: pone.0234179.s005.pdf [file pone.0234179.s005.pdf]

**S2 Table. Results of Study 1 without exclusion of participants with migration background.**

|                                                 | general attitudes                                                         |           |          |                          | warmth                                                                   |           |          |                          | competence                                                               |           |          |                          |
|-------------------------------------------------|---------------------------------------------------------------------------|-----------|----------|--------------------------|--------------------------------------------------------------------------|-----------|----------|--------------------------|--------------------------------------------------------------------------|-----------|----------|--------------------------|
|                                                 | <i>b</i>                                                                  | <i>SE</i> | <i>p</i> | <i>CI</i> <sub>95%</sub> | <i>b</i>                                                                 | <i>SE</i> | <i>p</i> | <i>CI</i> <sub>95%</sub> | <i>b</i>                                                                 | <i>SE</i> | <i>p</i> | <i>CI</i> <sub>95%</sub> |
| constant                                        | 6.456                                                                     | 0.252     | .001     | 5.958, 6.955             | 3.438                                                                    | 0.101     | .001     | 3.239, 3.637             | 3.364                                                                    | 0.109     | .001     | 3.148, 3.580             |
| pro-diversity beliefs                           | 1.911                                                                     | 0.296     | .001     | 1.326, 2.497             | 0.606                                                                    | 0.118     | .001     | 0.371, 0.840             | 0.631                                                                    | 0.128     | .001     | 0.377, 0.885             |
| neutral div. vs. instr. div. (D1)               | 0.283                                                                     | 0.365     | .439     | -0.440, 1.006            | -0.085                                                                   | 0.147     | .567     | -0.376, 0.207            | -0.089                                                                   | 0.160     | .576     | -0.405, 0.226            |
| detrimental div. vs. instr. div. (D2)           | -0.238                                                                    | 0.339     | .484     | -0.908, 0.432            | -0.094                                                                   | 0.136     | .487     | -0.363, 0.174            | -0.082                                                                   | 0.147     | .576     | -0.373, 0.208            |
| detrimental non-div. vs. instr. div. (D3)       | -0.635                                                                    | 0.378     | .097     | -1.387, 0.116            | -0.221                                                                   | 0.153     | .151     | -0.524, 0.082            | -0.269                                                                   | 0.166     | .107     | -0.598, 0.059            |
| D1 X pro-diversity beliefs                      | -0.691                                                                    | 0.447     | .124     | -1.576, 0.193            | -0.250                                                                   | 0.180     | .169     | -0.606, 0.107            | -0.405                                                                   | 0.195     | .040     | -0.791, -0.019           |
| D2 X pro-diversity beliefs                      | -0.797                                                                    | 0.394     | .045     | -1.576, -0.018           | -0.283                                                                   | 0.157     | .075     | -0.594, 0.023            | -0.376                                                                   | 0.170     | .029     | -0.713, -0.038           |
| D3 X pro-diversity beliefs                      | -0.778                                                                    | 0.500     | .122     | -1.767, 0.211            | -0.337                                                                   | 0.202     | .097     | -0.736, 0.062            | -0.233                                                                   | 0.219     | .289     | -0.666, 0.200            |
| <i>R</i> <sup>2</sup>                           | <i>R</i> <sup>2</sup> = .420, <i>F</i> (7, 122) = 12.604, <i>p</i> < .001 |           |          |                          | <i>R</i> <sup>2</sup> = .278, <i>F</i> (7, 124) = 6.812, <i>p</i> < .001 |           |          |                          | <i>R</i> <sup>2</sup> = .242, <i>F</i> (7, 124) = 5.650, <i>p</i> < .001 |           |          |                          |
| <i>R</i> <sup>2</sup> change due to interaction | $\Delta R^2 = .023$ , <i>F</i> (3, 122) = 1.620, <i>p</i> = .188          |           |          |                          | $\Delta R^2 = .025$ , <i>F</i> (3, 124) = 1.437, <i>p</i> = .234         |           |          |                          | $\Delta R^2 = .038$ , <i>F</i> (3, 124) = 2.054, <i>p</i> = .110         |           |          |                          |
