# Supplementary material for: When good for business is not good enough: Effects of pro-diversity beliefs and instrumentality of diversity on intergroup attitudes
Source: PubMed Central journal article supplement (PMC7263624; doi:10.1371/journal.pone.0234179), 2020-06-01
Supplement: pone.0234179.s006.pdf [file pone.0234179.s006.pdf]

**S3 Table. Results of Study 2 without exclusion of participants with migration background.**

|                                                            | prejudice |           |          |                  |  | social distance |           |          |                  |
|------------------------------------------------------------|-----------|-----------|----------|------------------|--|-----------------|-----------|----------|------------------|
|                                                            | <i>F</i>  | <i>df</i> | <i>p</i> | partial $\eta^2$ |  | <i>F</i>        | <i>df</i> | <i>p</i> | partial $\eta^2$ |
| corrected model                                            | 45.60     | 4         | .001     | .308             |  | 34.62           | 4         | .001     | .253             |
| constant                                                   | 27.91     | 1         | .001     | .064             |  | 52.67           | 1         | .001     | .114             |
| political orientation                                      | 170.79    | 1         | .001     | .294             |  | 124.84          | 1         | .001     | .234             |
| pro-diversity beliefs (justice vs. instrumental)           | 6.39      | 1         | .012     | .015             |  | 2.16            | 1         | .142     | .005             |
| instrumentality of refugees (instrumental vs. detrimental) | 4.57      | 1         | .033     | .011             |  | 14.05           | 1         | .001     | .033             |
| pro-diversity beliefs X instrumentality of refugees        | 1.35      | 1         | .246     | .003             |  | 0.24            | 1         | .623     | .001             |
| error                                                      |           | 410       |          |                  |  |                 | 409       |          |                  |
| <i>R</i> <sup>2</sup>                                      | .308      |           |          |                  |  | .253            |           |          |                  |
