# Supplementary material for: When good for business is not good enough: Effects of pro-diversity beliefs and instrumentality of diversity on intergroup attitudes
Source: PubMed Central journal article supplement (PMC7263624; doi:10.1371/journal.pone.0234179), 2020-06-01
Supplement: pone.0234179.s007.pdf [file pone.0234179.s007.pdf]

**S4 Table. Results of Study 2 without inclusion of covariate political orientation.**

|                                                            | prejudice |           |          |                  |  | social distance |           |          |                  |
|------------------------------------------------------------|-----------|-----------|----------|------------------|--|-----------------|-----------|----------|------------------|
|                                                            | <i>F</i>  | <i>df</i> | <i>p</i> | partial $\eta^2$ |  | <i>F</i>        | <i>df</i> | <i>p</i> | partial $\eta^2$ |
| corrected model                                            | 2.02      | 3         | .111     | .020             |  | 1.83            | 4         | .141     | .018             |
| constant                                                   | 1283.29   | 1         | .001     | .811             |  | 1408.99         | 1         | .001     | .823             |
| pro-diversity beliefs (justice vs. instrumental)           | 3.55      | 1         | .061     | .012             |  | 2.62            | 1         | .106     | .009             |
| instrumentality of refugees (instrumental vs. detrimental) | 1.95      | 1         | .033     | .006             |  | 2.16            | 1         | .143     | .007             |
| pro-diversity beliefs X instrumentality of refugees        | 0.12      | 1         | .734     | .000             |  | 0.26            | 1         | .609     | .001             |
| error                                                      |           | 299       |          |                  |  |                 | 302       |          |                  |
| <i>R</i> <sup>2</sup>                                      | .020      |           |          |                  |  | .018            |           |          |                  |
