# Supplementary material for: When good for business is not good enough: Effects of pro-diversity beliefs and instrumentality of diversity on intergroup attitudes
Source: PubMed Central journal article supplement (PMC7263624; doi:10.1371/journal.pone.0234179), 2020-06-01
Supplement: pone.0234179.s008.pdf [file pone.0234179.s008.pdf]

**S5 Table. Results of Study 3 without exclusion of participants with migration background.**

|                                                            | prejudice |           |          |                  |
|------------------------------------------------------------|-----------|-----------|----------|------------------|
|                                                            | <i>F</i>  | <i>df</i> | <i>p</i> | partial $\eta^2$ |
| corrected model                                            | 104.15    | 4         | .001     | .350             |
| constant                                                   | 41.14     | 1         | .001     | .050             |
| political orientation                                      | 374.90    | 1         | .001     | .326             |
| pro-diversity beliefs (justice vs. instrumental)           | 2.35      | 1         | .126     | .003             |
| instrumentality of refugees (instrumental vs. detrimental) | 38.49     | 1         | .001     | .047             |
| pro-diversity beliefs X instrumentality of refugees        | 3.25      | 1         | .072     | .004             |
| error                                                      |           | 775       |          |                  |
| <i>R</i> <sup>2</sup>                                      | .350      |           |          |                  |
