# Supplementary material for: When good for business is not good enough: Effects of pro-diversity beliefs and instrumentality of diversity on intergroup attitudes
Source: PubMed Central journal article supplement (PMC7263624; doi:10.1371/journal.pone.0234179), 2020-06-01
Supplement: pone.0234179.s009.pdf [file pone.0234179.s009.pdf]

**S6 Table. Results of Study 3 without inclusion of covariate political orientation.**

|                                                            | prejudice |           |          |                  |
|------------------------------------------------------------|-----------|-----------|----------|------------------|
|                                                            | <i>F</i>  | <i>df</i> | <i>p</i> | partial $\eta^2$ |
| corrected model                                            | 6.39      | 3         | .001     | .030             |
| constant                                                   | 2409.59   | 1         | .001     | .794             |
| pro-diversity beliefs (justice vs. instrumental)           | 1.45      | 1         | .229     | .002             |
| instrumentality of refugees (instrumental vs. detrimental) | 16.19     | 1         | .001     | .025             |
| pro-diversity beliefs X instrumentality of refugees        | 1.49      | 1         | .223     | .002             |
| error                                                      |           | 625       |          |                  |
| <i>R</i> <sup>2</sup>                                      | .030      |           |          |                  |
