# Supplementary material for: When good for business is not good enough: Effects of pro-diversity beliefs and instrumentality of diversity on intergroup attitudes
Source: PubMed Central journal article supplement (PMC7263624; doi:10.1371/journal.pone.0234179), 2020-06-01
Supplement: pone.0234179.s010.pdf [file pone.0234179.s010.pdf]

**S7 Table. Results of Study 4 with inclusion of covariate political orientation.**

|                                                                     | prejudice |           |          |                  |
|---------------------------------------------------------------------|-----------|-----------|----------|------------------|
|                                                                     | <i>F</i>  | <i>df</i> | <i>p</i> | partial $\eta^2$ |
| corrected model                                                     | 10.91     | 4         | .001     | .114             |
| constant                                                            | 106.42    | 1         | .001     | .239             |
| political orientation                                               | 35.83     | 1         | .001     | .096             |
| pro-diversity beliefs (justice-based vs. instrumental)              | 0.63      | 1         | .430     | .002             |
| instrumentality of exchange students (instrumental vs. detrimental) | 1.83      | 1         | .177     | .005             |
| pro-diversity beliefs X instrumentality of exchange students        | 4.10      | 1         | .031     | .014             |
| error                                                               |           | 338       |          |                  |
| <i>R</i> <sup>2</sup>                                               | .114      |           |          |                  |
