# Supplementary material for: When good for business is not good enough: Effects of pro-diversity beliefs and instrumentality of diversity on intergroup attitudes
Source: PubMed Central journal article supplement (PMC7263624; doi:10.1371/journal.pone.0234179), 2020-06-01
Supplement: pone.0234179.s011.pdf [file pone.0234179.s011.pdf]

**S8 Table. Results of Study 4 without exclusion of participants with migration background and participants that studied abroad.**

|                                                                     | prejudice |           |          |                  |
|---------------------------------------------------------------------|-----------|-----------|----------|------------------|
|                                                                     | <i>F</i>  | <i>df</i> | <i>p</i> | partial $\eta^2$ |
| corrected model                                                     | 2.03      | 3         | .108     | .013             |
| constant                                                            | 3589.05   | 1         | .001     | .884             |
| pro-diversity beliefs (justice-based vs. instrumental)              | 0.03      | 1         | .874     | .000             |
| instrumentality of exchange students (instrumental vs. detrimental) | 4.79      | 1         | .029     | .010             |
| pro-diversity beliefs X instrumentality of exchange students        | 1.06      | 1         | .303     | .002             |
| error                                                               |           | 472       |          |                  |
| <i>R</i> <sup>2</sup>                                               | .013      |           |          |                  |
